# Supplementary material
Source: publisher site journal article supplement (https://www.dovepress.com/article/363652)
Supplement: Supplementary file 1 [file get_supplementary_file.php]

Table S1 The basic information of *E.coli* clinical isolates.

| Strain | Age | Gender | Source |
| --- | --- | --- | --- |
| ICU0001 | 4y 6m | male | phlegm |
| ICU0002 | 10y | male | phlegm |
| ICU0003 | 2m | male | phlegm |
| ICU0004 | 1y 8m | male | phlegm |
| ICU0005 | 2h 11min | male | phlegm |
| ICU0006 | 1y | female | phlegm |
| ICU0007 | 21d | male | pus |
| ICU0008 | 30d | male | phlegm |
| ICU0009 | 22d | male | pus |
| ICU0010 | 1y | female | phlegm |
| ICU0011 | 1y 1d | male | excreta |
| ICU0012 | 22d | male | phlegm |
| ICU0013 | 1m 16d | male | phlegm |
| ICU0014 | 1m | male | excreta |
| ICU0015 | 6m 7d | male | phlegm |
| ICU0016 | 3m | male | excreta |
| ICU0017 | 6m | male | pharyngeal swab |
| ICU0018 | 3d | female | phlegm |
| ICU0019 | 10d | female | phlegm |
| ICU0020 | 1y | male | excreta |
| ICU0021 | 4d | male | phlegm |
| ICU0022 | 6h 5min | female | phlegm |
| ICU0023 | 8m | female | excreta |
| ICU0024 | 3m | male | phlegm |
| ICU0025 | 12y | male | pharyngeal swab |
| ICU0026 | 9m | male | excreta |
| ICU0027 | 7m | male | excreta |
| ICU0028 | 3D | female | phlegm |
| ICU0029 | 1m 12d | female | blood |
| ICU0030 | 2m | female | phlegm |
| ICU0031 | 2m | female | phlegm |
| ICU0032 | 2m | female | excreta |
| ICU0033 | 4d | female | urine |
| ICU0034 | 6d | female | phlegm |
| ICU0035 | 10d | female | phlegm |
| ICU0036 | 29d | male | phlegm |
| ICU0037 | 1h 47min | male | phlegm |
| ICU0038 | 6h 49min | female | excreta |
| ICU0039 | 6h 49min | female | phlegm |
| ICU0040 | 1y 8m | male | excreta |
| ICU0041 | 8d | female | phlegm |
| ICU0042 | 15d | female | phlegm |
| ICU0043 | 1m 23d | male | phlegm |
| ICU0044 | 15h 5min | male | excreta |
| ICU0045 | 4d | female | excreta |
| ICU0046 | 4d | female | phlegm |
| ICU0047 | 1m 29d | female | pharyngeal swab |
| ICU0048 | 1y 7m | male | excreta |
| ICU0049 | 2y | male | pus |
| ICU0050 | 1h 15min | male | phlegm |
| ICU0051 | 1y 9m | female | phlegm |
| ICU0052 | 12h 46min | male | phlegm |
| ICU0053 | 8d | male | phlegm |
| ICU0054 | 17h 46min | female | phlegm |
| ICU0055 | 3m | female | pharyngeal swab |
| ICU0056 | 11h 5min | male | phlegm |
| ICU0057 | 8d | male | phlegm |
| ICU0058 | 8y | male | blood |
| ICU0059 | 15d | male | phlegm |
| ICU0060 | 11h 28min | male | excreta |
| ICU0061 | 1d | male | excreta |
| ICU0062 | 7d | male | phlegm |
| ICU0063 | 6d | male | pus |
| ICU0064 | 5y | male | excreta |
| ICU0065 | 4d | female | phlegm |
| ICU0066 | 11d | female | phlegm |
| ICU0067 | 11h 25min | female | excreta |
| ICU0068 | 10h 40min | male | phlegm |
| ICU0069 | 18h 28min | male | excreta |
| ICU0070 | 4d | male | excreta |
| ICU0071 | 8d | male | phlegm |
| ICU0072 | 8d | male | excreta |
| ICU0073 | 15d | male | excreta |
| ICU0074 | 1h 30min | male | phlegm |
| ICU0075 | 4d | female | pus |
| ICU0076 | 1d | male | phlegm |
| ICU0077 | 22h 9min | male | phlegm |
| ICU0078 | 22h 9min | male | excreta |
| ICU0079 | 23h 32min | male | phlegm |
| ICU0080 | 5d | male | pus |
| ICU0081 | 23d | male | blood |

Table S2 Antibiotic resistance genes used in this study and their PCR primers.

| Gene | Name | Oligonucleotide sequences (5’-3’) | Products (bp) | Tm (℃) |
| --- | --- | --- | --- | --- |
| Antibiotic resistance genes  β-lactam resistance | | | | |
| blaTEM65 | FW | ATTCTTGAAGACGAAAGGGC | 1322 | 53 |
| RV | ACGCTCAGTGGAACGAAAAC |
| blaSHV65 | FW | CACTCAAGGATGTATTGTG | 864 | 50 |
| RV | TTAGCGTTGCCAGTGCTCG |
| blaOXA66 | FW | ACACAATACATATCAACTTCGC | 813 | 50 |
| RV | AGTGTGTTTAGAATGGTGATC |
| blaPSE67 | FW | TTTGGTTCCGCGCTATCTG | 150 | 55 |
| RV | TACTCCGAGCACCAAATCCG |
| blaCTX-M67 | FW | CGCTTTGCGATGTGCAG | 550 | 55 |
| RV | ACCGCGATATCGTTGGT |
| Quinolone resistance | | | | |
| qnrA67 | FW | ATTTCTCACGCCAGGATTTG | 573 | 55 |
| RV | TGCCAGGCACAGATCTTGAC |
| qnrB67 | FW | CGACCTKAGCGGCACTGAAT | 513 | 60 |
| RV | GAGCAACGAYGCCTGGTAGYTG |
| qnrS67 | FW | ATGGAAACCTACAATCATAC | 491 | 47 |
| RV | AAAAACACCTCGACTTAAGT |
| acc(6')-Ib-cr67 | FW | TTGCGATGCTCTATGAGTGGCTA | 481 | 58 |
| RV | CTCGAATGCCTGGCGTGTTT |
| qepA67 | FW | GCAGGTCCAGCAGCGGGTAG | 217 | 60 |
| RV | CTTCCTGCCCGAGTATCGTG |
| Aminoglycoside resistance | | | | |
| acc(6')-Ib67 | FW | TTGCGATGCTCTATGAGTGGCTA | 481 | 58 |
| RV | CTCGAATGCCTGGCGTGTTT |
| aac(3)-I67 | FW | ACCTACTCCCAACATCAGCC | 157 | 55 |
| RV | ATATAGATCTCACTACGCGC |
| aac(3)-II67 | FW | ACTGTGATGGGATACGCGTC | 236 | 57 |
| RV | CTCCGTCAGCGTTTCAGCTA |
| aac(3)- Ⅲ67 | FW | CACAAGAACGTGGTCCGCTA | 184 | 55 |
| RV | AACAGGTAAGCATCCGCATC |
| aac(3)-IV67 | FW | CTTCAGGATGGCAAGTTGGT | 284 | 55 |
| RV | TCATCTCGTTCTCCGCTCAT |
| ant(2'')67 | FW | ATGTTACGCAGCAGGGCAGTCG | 188 | 60 |
| RV | CGTCAGATCAATATCATCGTGC |
| Tetracycline resistance | | | | |
| tetA67 | FW | GCGCCTTTCCTTTGGGTTCT | 830 | 58 |
| RV | CCACCCGTTCCACGTTGTTA |
| tetB67 | FW | CATTAATAGGCGCATCGCTG | 929 | 54 |
| RV | TGAAGGTCATCGATAGCAGG |
| Polymyxin resistance | | | | |
| Mcr-168 | FW | CGGTCAGTCCGTTTGTTC | 309 | 54 |
| RV | CTTGGTCGGTCTGTA GGG |
| Mcr-268 | FW | TGGTACAGCCCCTTTATT | 1747 | 54 |
| RV | GCTTGAGATTGGGTTATGA |
| Mcr-368 | FW | TTGGCACTGTATTTTGCATTT | 543 | 48 |
| RV | TTAACGAAATTGGCTGGAACA |
| Mcr-468 | FW | ATTGGGATAGTCGCCTTTTT | 487 | 50 |
| RV | TTACAGCCAGAATCATTATCA |
| Mcr-565 | FW | ATGCGGTTGTCTGCATTTATC | 1643 | 48 |
